# Supplementary material
Source: PubMed Central journal article supplement (PMC3842573)
Supplement: 97320630009889S1.pdf [file 97320630009889S1.pdf]

## Supplementary material:

**Table 1:** Surfex score of active compound

| S.No | Compounds             | CScore score <sup>a</sup> | Crash score <sup>b</sup> | Polar score <sup>c</sup> | G score <sup>d</sup> | PMF score <sup>e</sup> | D score <sup>f</sup> | Chem score <sup>g</sup> | No. of hydrogen bonds |
|------|-----------------------|---------------------------|--------------------------|--------------------------|----------------------|------------------------|----------------------|-------------------------|-----------------------|
| 1.   | Quercetin             | 5.95                      | -0.79                    | 5.90                     | -109.38              | -32.24                 | -95.13               | -24.43                  | 6                     |
| 2.   | Chlorogenic acid      | 5.66                      | -1.97                    | 5.89                     | -135.54              | -78.77                 | -127.01              | -22.47                  | 5                     |
| 3.   | 5,7-dimethoxycoumarin | 4.46                      | -0.66                    | 3.17                     | -83.86               | -35.99                 | -54.88               | -17.67                  | 5                     |
| 4.   | Caffeic acid          | 4.44                      | -1.20                    | 5.33                     | -111.6               | -51.47                 | -53.77               | -18.23                  | 4                     |
| 5.   | Kaempferol            | 3.87                      | -1.32                    | 2.66                     | -70.07               | -69.40                 | -95.20               | -21.76                  | 5                     |
| 6.   | p-Coumaric acid       | 3.81                      | -1.01                    | 3.02                     | -72.41               | -11.99                 | -82.9                | -23.39                  | 6                     |
| 7.   | Protocatechuic acid   | 2.95                      | -0.50                    | 2.54                     | -64.54               | -35.55                 | -127.5               | -13.78                  | 5                     |

<sup>a</sup> CScore is a consensus scoring which uses multiple types of scoring functions to rank the affinity of ligands

<sup>b</sup> Crash-score revealing the inappropriate penetration into the binding site.

<sup>c</sup> Polar region of the ligand.

<sup>d</sup> G-score showing hydrogen bonding, complex (ligand-protein), and internal (ligand-ligand) energies.

<sup>e</sup> PMF-score indicating the Helmholtz free energies of interactions for protein-ligand atom pairs (Potential of Mean Force, PMF).

<sup>f</sup> D-score for charge and van der Waals interactions between the protein and the ligand.

<sup>g</sup> Chem-score points for hydrogen bonding, lipophilic contact, and rotational entropy, along with an intercept term.

**Table 2:** Molecular properties and drug likeness of active compounds

| S.No | Compounds             | PubChem CID | Molecular Weight[g/mol] | LogP (Octanol-water partition coefficient value) | H-Bond Donor | H-Bond Acceptor |
|------|-----------------------|-------------|-------------------------|--------------------------------------------------|--------------|-----------------|
| 1.   | Quercetin             | 5280343     | 302.2                   | 1.5                                              | 5            | 7               |
| 2.   | Chlorogenic Acid      | 1794427     | 354.3                   | 0.4                                              | 6            | 9               |
| 3.   | 5,7-dimethoxycoumarin | 2775        | 206.1                   | 1.9                                              | 0            | 4               |
| 4.   | Caffeic acid          | 4652        | 180.1                   | 1.2                                              | 3            | 4               |
| 5.   | Kaempferol            | 5280863     | 286.2                   | 1.9                                              | 4            | 6               |
| 6.   | p-Coumaric acid       | 637542      | 164.1                   | 1.5                                              | 2            | 3               |
| 7.   | Protocatechuic acid   | 72          | 154.1                   | 1.1                                              | 3            | 4               |

**Table 3:** ADMET Predicted profile for active compound

| (a) Absorption                   |           |                  |                       |              |            |                 |                     |        |
|----------------------------------|-----------|------------------|-----------------------|--------------|------------|-----------------|---------------------|--------|
| Models                           | Quercetin | Chlorogenic acid | 5,7-dimethoxycoumarin | Caffeic acid | Kaempferol | p-Coumaric acid | Protocatechuic acid |        |
| Blood-Brain barrier              | BBB+      | BBB+             | BBB+                  | BBB+         | BBB+       | BBB+            | BBB+                | BBB+   |
| Human Intestinal Absorption      | HIA+      | HIA+             | HIA+                  | HIA+         | HIA+       | HIA+            | HIA+                | HIA+   |
| Caco-2 Permeability              | Caco2+    | Caco2+           | Caco2+                | Caco2+       | Caco2+     | Caco2+          | Caco2+              | Caco2+ |
| P-glycoprotein Inhibitor         | NI        | NI               | NI                    | NI           | NI         | NI              | NI                  | NI     |
| Renal Organic Cation Transporter | NI        | NI               | NI                    | NI           | NI         | NI              | NI                  | NI     |
| (b) Metabolism                   |           |                  |                       |              |            |                 |                     |        |
| CYP450 Substrate                 | 2C9 NS    | NS               | NS                    | NS           | NS         | NS              | NS                  | NS     |
| CYP450 Substrate                 | 2D6 NS    | NS               | NS                    | NS           | NS         | NS              | NS                  | NS     |
| CYP450 Substrate                 | 3A4 NS    | NS               | NS                    | NS           | NS         | NS              | NS                  | NS     |

|           |     |    |    |    |    |    |    |    |
|-----------|-----|----|----|----|----|----|----|----|
| Substrate |     |    |    |    |    |    |    |    |
| CYP450    | 1A2 | NI |
| Inhibitor |     |    |    |    |    |    |    |    |

**Table 3:** (contd.) ADMET Predicted profile for active compounds

|                     |      |    |    |    |    |    |    |    |
|---------------------|------|----|----|----|----|----|----|----|
| CYP450              | 2C9  | NI |
| Inhibitor           |      |    |    |    |    |    |    |    |
| CYP450              | 2D6  | NI |
| Inhibitor           |      |    |    |    |    |    |    |    |
| CYP450              | 2C19 | NI |
| Inhibitor           |      |    |    |    |    |    |    |    |
| CYP450              | 3A4  | NI |
| Inhibitor           |      |    |    |    |    |    |    |    |
| <b>(c) Toxicity</b> |      |    |    |    |    |    |    |    |
| AMES Toxicity       | NT   | NT | NT | NT | NT | NT | NT | NT |
| Carcinogens         | NC   | NC | NC | NC | NC | NC | NC | NC |

NI - Non-inhibitor; NS - Non-substrate; NT - Non-toxic; NC - Non-carcinogen
